# Supplementary material for: Determination of Band Structure of Naturally Occurring Goethite with Al Substitution: A Case Study of Zhushan Iron Zone
Source: MDPI journal article supplement (doi:10.3390/ma15041465), 2022-02-16
Supplement: s1 [file s1]

## Article

# Determination of Band Structure of Naturally Occurring Goethite with Al Substitution: A Case Study of Zhushan Iron Zone

Yan Shao <sup>1</sup>, Guofeng Hu <sup>1</sup>, Zihao Liu <sup>1</sup>, Xiaoming Xu <sup>1,2,\*</sup>, Mengqi Zhang <sup>2</sup>, Cong Ding <sup>2</sup> and Yan Li <sup>2</sup>

<sup>1</sup> Wuhan City Environment Protection Engineering Limited Company, Wuhan 430205, China; 37004@ccepc.com (Y.S.); 54001@ccepc.com (G.H.); 10142@ccepc.com (Z.L.)

<sup>2</sup> School of Earth and Space Sciences, Peking University, Beijing 100871, China; mengqizhang@pku.edu.cn (M.Z.); cding\_pku@163.com (C.D.); lianpku@163.com (Y.L.)

\* Correspondence: xmxu@pku.edu.cn

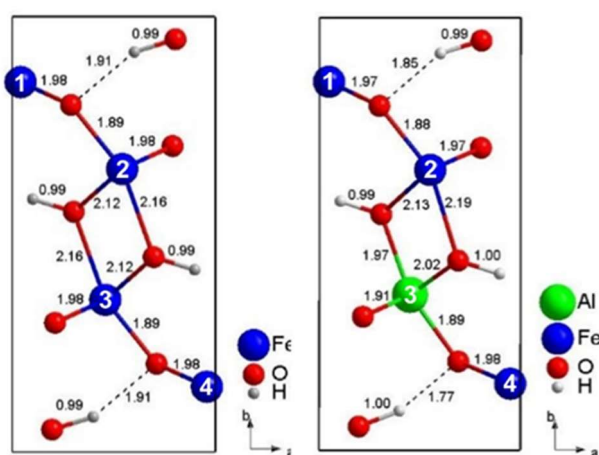

**Figure S1.** Pure goethite and Al-goethite geometries obtained with GGA+U. Distances between atoms are expressed in Armstrongs (Å).

**Citation:** Shao, Y.; Hu, G.; Liu, Z.; Xu, X.; Zhang, M.; Ding, C.; Li, Y. Determination of Band Structure of Naturally Occurring Goethite with Al Substitution: A Case Study of Zhushan Iron Zone. *Materials* **2022**, *15*, 1465.

<https://doi.org/10.3390/ma15041465>

Academic Editor: Luminița Isac

Received: 25 January 2022

Accepted: 12 February 2022

Published: 16 February 2022

**Publisher's Note:** MDPI stays neutral with regard to jurisdictional claims in published maps and institutional affiliations.

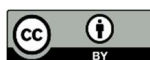

**Copyright:** © 2022 by the authors. Submitted for possible open access publication under the terms and conditions of the Creative Commons Attribution (CC BY) license (<https://creativecommons.org/licenses/by/4.0/>).
